# Supplementary material for: Providers and purchasers Readiness for Case-Based Payment and its Systemic Constraints in Ethiopia: A Mixed-Methods Study
Source: Research Square preprint supplement (doi:10.21203/rs.3.rs-8454222/v1), 2026-02-03
Supplement: Supplementary file 2 [file c8cd37ee47b91c37e249d28c.pdf]

## 1. Healthcare Provider Readiness Survey

(Participants from: hospitals and health centers: Facility management teams (CEO, HMIS, Finance, Clinical Dept. Head)

| Section I: organizational Characteristics |                                            |                                                                                                                                                               |                          |
|-------------------------------------------|--------------------------------------------|---------------------------------------------------------------------------------------------------------------------------------------------------------------|--------------------------|
| Code                                      | Question                                   | Response                                                                                                                                                      | Skip Logic               |
| <b>Facility Identification</b>            |                                            |                                                                                                                                                               |                          |
| PRS-01                                    | Region                                     | 1. Oromia<br>2. SW region<br>3. Somali<br>4. AA                                                                                                               | -                        |
| PRS-02                                    | Facility name                              | Text: _____                                                                                                                                                   | -                        |
| PRS-03                                    | Facility type                              | 1. Health Center<br>2. Primary Hospital<br>3. General Hospital<br>4. Specialized hospital                                                                     |                          |
| PRS-04                                    | Your role in this institution              | 1. CEO/delegate<br>2. HMIS<br>3. Clinical department head<br>4. Other(specify)                                                                                |                          |
|                                           | Your profession                            | 1. Physician (all type)<br>2. Nurse (all type)<br>3. Health officer<br>4. Environmental health<br>5. HIT<br>6. Midwifery<br>7. Nutrition<br>8. Other(specify) |                          |
|                                           | Educational status                         | 1. Diploma<br>2. BSc<br>3. MSc/MPH<br>4. Specialty certificate<br>5. Sub-specialty                                                                            |                          |
|                                           | Total years of experience                  | (in years)                                                                                                                                                    |                          |
|                                           | years of experience in this institution    | (in years)                                                                                                                                                    |                          |
| <b>Service Organization</b>               |                                            |                                                                                                                                                               |                          |
| PR-02                                     | How many outpatient consultations did your | Numeric: ____                                                                                                                                                 | Ask if Skip if PRS-04 =1 |

|                                  |                                                                                                                      |                                                                                                                                                                                                                                           |                                    |
|----------------------------------|----------------------------------------------------------------------------------------------------------------------|-------------------------------------------------------------------------------------------------------------------------------------------------------------------------------------------------------------------------------------------|------------------------------------|
|                                  | facility handle in the last quarter?                                                                                 |                                                                                                                                                                                                                                           |                                    |
| PR-03                            | To what extent do you agree that your facility is equipped to provide maternal health services (ANC, delivery, PNC)? | <input type="checkbox"/> Strongly Disagree<br><input type="checkbox"/> Disagree<br><input type="checkbox"/> Neutral<br><input type="checkbox"/> Agree<br><input type="checkbox"/> Strongly Agree                                          | Ask if Skip if PRS-04 =1           |
| PR-04                            | What percentage of essential medicines were available in the last month?                                             | Numeric: ____%                                                                                                                                                                                                                            | Ask if Skip if PRS-04 =1           |
| PR-05                            | Rate the frequency of essential medication stockouts in the last 6 months.                                           | <input type="checkbox"/> Never <input type="checkbox"/> Rarely <input type="checkbox"/> Sometimes <input type="checkbox"/> Often <input type="checkbox"/> Always                                                                          | Ask if Skip if PRS-04 =1           |
| <b>HIS Capabilities</b>          |                                                                                                                      |                                                                                                                                                                                                                                           |                                    |
| PR-06                            | Which electronic systems does your facility use? (Select all)                                                        | <input type="checkbox"/> HMIS/DHIS2<br><input type="checkbox"/> Laboratory system<br><input type="checkbox"/> Pharmacy system<br><input type="checkbox"/> EMR<br><input type="checkbox"/> Other(specify)<br><input type="checkbox"/> None | Ask if Skip if PRS-04 =2           |
| PR-07                            | How often is data submitted to HMIS/DHIS2?                                                                           | <input type="checkbox"/> Daily<br><input type="checkbox"/> Weekly<br><input type="checkbox"/> Monthly<br><input type="checkbox"/> Quarterly<br><input type="checkbox"/> Never                                                             | Ask if Skip if PRS-04 =2           |
| PR-08                            | Does your facility generate automated reports for service coverage (e.g., ANC, immunization)?                        | <input type="checkbox"/> Yes <input type="checkbox"/> No                                                                                                                                                                                  | Ask if Skip if PRS-04 =2           |
| <b>ICD Coding Infrastructure</b> |                                                                                                                      |                                                                                                                                                                                                                                           |                                    |
| PR-09                            | Does your facility use standardized diagnosis codes (e.g., ICD-10)?                                                  | 1. Yes 0. No 99. I don't know                                                                                                                                                                                                             | If <b>0, or 99</b> , skip to PR-12 |
| PR-10                            | How are diagnosis codes assigned?                                                                                    | <input type="checkbox"/> Automated via HIS<br><input type="checkbox"/> Manual entry<br><input type="checkbox"/> Not applicable                                                                                                            | —                                  |
| PR-11                            | What percentage of diagnoses are coded in the system?                                                                | Numeric: ____%                                                                                                                                                                                                                            | —                                  |
| <b>Human Resources</b>           |                                                                                                                      |                                                                                                                                                                                                                                           |                                    |
| PR-12                            | Number of staff trained in claims processing/billing:                                                                | Numeric: ____                                                                                                                                                                                                                             | Ask if Skip if PRS-04 =1           |

|                            |                                                                                          |                                                                                                                                                                                                                                 |                                              |
|----------------------------|------------------------------------------------------------------------------------------|---------------------------------------------------------------------------------------------------------------------------------------------------------------------------------------------------------------------------------|----------------------------------------------|
| PR-13                      | Are there designated staff for coding diagnoses?                                         | <input type="checkbox"/> Yes <input type="checkbox"/> No <input type="checkbox"/> Not applicable                                                                                                                                | Ask if Skip if PRS-04 =1                     |
| <b>Claims Processing</b>   |                                                                                          |                                                                                                                                                                                                                                 |                                              |
| PR-14                      | Does your facility submit claims to CBHI?                                                | 1. Yes 0. No 99. I don't know                                                                                                                                                                                                   | If <b>0, or 99</b> , skip to PR-18           |
| PR-15                      | Average time to prepare and submit a claim (days):                                       | Numeric: _____                                                                                                                                                                                                                  | —                                            |
| PR-16                      | Percentage of claims rejected by CBHI in the last quarter:                               | Numeric: _____%                                                                                                                                                                                                                 | —                                            |
| PR-17                      | Reasons for claim rejections (Select all):                                               | <input type="checkbox"/> Incomplete documentation<br><input type="checkbox"/> Incorrect coding<br><input type="checkbox"/> Eligibility issues<br><input type="checkbox"/> Other: _____                                          | —                                            |
| <b>Perceived Readiness</b> |                                                                                          |                                                                                                                                                                                                                                 |                                              |
| PR-18                      | Rate your facility's readiness to implement electronic claims submission:                | <input type="checkbox"/> Very low <input type="checkbox"/> Low<br><input type="checkbox"/> Moderate <input type="checkbox"/> High <input type="checkbox"/> Very high                                                            | Ask if Skip if PRS-04 =1                     |
| PR-19                      | Major barriers to efficient claims processing (Select all):                              | <input type="checkbox"/> Staff shortages <input type="checkbox"/> Lack of training<br><input type="checkbox"/> Poor internet connectivity <input type="checkbox"/> Inadequate software<br><input type="checkbox"/> Other: _____ | Ask if Skip if PRS-04 =1                     |
| <b>Revenue Streams</b>     |                                                                                          |                                                                                                                                                                                                                                 |                                              |
| FM-01                      | Total government budget allocation (line-item) in the last fiscal year (local currency): | Numeric: _____                                                                                                                                                                                                                  | Ask if Skip if PRS-04 =1                     |
| FM-02                      | Total internal revenue generated in the last quarter (local currency):                   | Numeric: _____                                                                                                                                                                                                                  | Ask if Skip if PRS-04 =1                     |
| FM-03                      | Does your facility receive CBHI reimbursements?                                          | 1. Yes 0. No 99. I don't know                                                                                                                                                                                                   | If <b>0, or 99</b> , skip to FM-06           |
| FM-04                      | Total CBHI claims reimbursed in the last quarter (local currency):                       | Numeric: _____                                                                                                                                                                                                                  | —                                            |
| FM-05                      | Total capitation payments received in the last 6 months (local currency) :               | Numeric: _____                                                                                                                                                                                                                  | Only if the facility implementing capitation |

|                                             |                                                                                   |                                                                                                                                                                                                                                        |                                    |
|---------------------------------------------|-----------------------------------------------------------------------------------|----------------------------------------------------------------------------------------------------------------------------------------------------------------------------------------------------------------------------------------|------------------------------------|
| <b>Budget Execution</b>                     |                                                                                   |                                                                                                                                                                                                                                        |                                    |
| FM-06                                       | Percentage of allocated annual budget spent in the last quarter:                  | Numeric: ____%                                                                                                                                                                                                                         | Ask if Skip if PRS-04 =1           |
| FM-07                                       | Percentage of drug budget spent in the last quarter:                              | Numeric: ____%                                                                                                                                                                                                                         | Ask if Skip if PRS-04 =1           |
| FM-08                                       | Was the facility allowed to reallocate funds across budget lines?                 | <input type="checkbox"/> Yes <input type="checkbox"/> No                                                                                                                                                                               | Ask if Skip if PRS-04 =1           |
| <b>Expenditure Tracking</b>                 |                                                                                   |                                                                                                                                                                                                                                        |                                    |
| FM-09                                       | Are expenditures tracked electronically?                                          | 1. Yes 0. No 99. I don't know                                                                                                                                                                                                          | If <b>0, or 99</b> , skip to FM-12 |
| FM-10                                       | System used for expenditure tracking:                                             | <input type="checkbox"/> Excel <input type="checkbox"/> HMIS/DHIS2<br><input type="checkbox"/> Dedicated software<br><input type="checkbox"/> Other: _____                                                                             | —                                  |
| FM-11                                       | Frequency of financial reconciliation:                                            | <input type="checkbox"/> Daily <input type="checkbox"/> Weekly<br><input type="checkbox"/> Monthly <input type="checkbox"/> Quarterly<br><input type="checkbox"/> Never                                                                | —                                  |
| <b>Financial Autonomy &amp; Challenges</b>  |                                                                                   |                                                                                                                                                                                                                                        |                                    |
| FM-12                                       | Can the facility retain surplus revenue?                                          | 1. Yes 0. No 99. I don't know                                                                                                                                                                                                          | If <b>0, or 99</b> , skip to mo1   |
| FM-13                                       | Major financial management challenges (Select all):                               | <input type="checkbox"/> Delayed fund disbursement<br><input type="checkbox"/> Inadequate budget<br><input type="checkbox"/> Poor accounting skills<br><input type="checkbox"/> Fraud/leakage<br><input type="checkbox"/> Other: _____ | —                                  |
| FM-14                                       | Total value of exempted services provided in the last quarter (local currency):   | Numeric: _____                                                                                                                                                                                                                         |                                    |
| <b>Section II: organizational Readiness</b> |                                                                                   |                                                                                                                                                                                                                                        |                                    |
|                                             | <b>Domain 1: Ability to Measure Outcomes</b>                                      |                                                                                                                                                                                                                                        |                                    |
| Mo1                                         | Organization uses data to understand the specific health needs of the population. |                                                                                                                                                                                                                                        |                                    |
|                                             | <b>Preliminary</b>                                                                |                                                                                                                                                                                                                                        |                                    |
|                                             | Organization has capacity to monitor primary health conditions.                   | Yes/No                                                                                                                                                                                                                                 |                                    |
|                                             | Available insurance or socio-economic data is examined infrequently.              | Yes/No                                                                                                                                                                                                                                 |                                    |
|                                             | Organization has ability to track performance against quality benchmarks.         | Yes/No                                                                                                                                                                                                                                 |                                    |
|                                             | Data is not readily available and/or challenging to collect.                      | Yes/No                                                                                                                                                                                                                                 |                                    |

|     |                                                                               |        |
|-----|-------------------------------------------------------------------------------|--------|
|     | Data is limited to annual aggregate measures.                                 | Yes/No |
|     | Electronic Health Record (EHR) is functional but has little interoperability. | Yes/No |
|     | Decisions are made regularly with incomplete data.                            | Yes/No |
|     | <b>Intermediate</b>                                                           | Yes/No |
|     | Organization regularly examines internal and external data sources.           | Yes/No |
|     | Reporting capacity can stratify data by meaningful groups.                    | Yes/No |
|     | Organization can conduct trend analysis over time.                            | Yes/No |
|     | There is a strategy in place to integrate EHR and analytic platforms.         | Yes/No |
|     | Integration of patient-level data is available for analysis.                  | Yes/No |
|     | Availability of practice-level dashboards to track performance.               | Yes/No |
|     | <b>Advanced</b>                                                               |        |
|     | Organization regularly uses data with meaningful stratifications.             | Yes/No |
|     | Established feedback loop to incorporate patient input.                       | Yes/No |
|     | Data on patient need/acuity drives targeted interventions.                    | Yes/No |
|     | Common EHR analytics across organization.                                     | Yes/No |
|     | Ingrained understanding of data-driven decision-making processes.             | Yes/No |
|     | Significant investment in advanced data-driven strategy.                      | Yes/No |
| Mo2 | Organization tracks quality measures.                                         |        |
|     | <b>Preliminary</b>                                                            |        |
|     | Organization does not have defined key performance indicators.                | Yes/No |
|     | Data available is dependent on claims data.                                   | Yes/No |
|     | Organization can track and report National Measure Sets.                      | Yes/No |
|     | Reports include clinical variables such as diagnosis, risk factors.           | Yes/No |
|     | Limited reporting is available on outcomes.                                   | Yes/No |
|     | Available quality reporting is primarily process measure based.               | Yes/No |
|     | <b>Intermediate</b>                                                           |        |
|     | The organization has defined metrics for client services.                     | Yes/No |

|      |                                                                                               |        |
|------|-----------------------------------------------------------------------------------------------|--------|
|      | Patient assessments are completed and associated with outcomes.                               | Yes/No |
|      | Regular reports are available to monitor metrics, no formal performance targets.              | Yes/No |
|      | A quality strategy guides a Plan do study act (PDSA) process.                                 | Yes/No |
|      | Client assessment scores are captured at a single point in time.                              | Yes/No |
|      | Data on acute events is available but not actionable.                                         | Yes/No |
|      | <b>Advanced</b>                                                                               | Yes/No |
|      | Well-defined quality metrics exist among programs.                                            | Yes/No |
|      | Organization uses data to monitor volume, outcomes, and process.                              | Yes/No |
|      | Available data includes client assessment scores over time.                                   | Yes/No |
|      | Real-time actionable data is available.                                                       | Yes/No |
|      | Organization has access to closed-loop referral data.                                         | Yes/No |
|      | Reports and dashboards are automatically updated and used daily.                              | Yes/No |
|      | <b>Domain 2: Board &amp; Leadership Readiness</b>                                             |        |
| Bdr1 | Leadership and Board receive metrics associated with population health management strategies. |        |
|      | <b>Preliminary</b>                                                                            |        |
|      | Board receives performance data infrequently.                                                 | Yes/No |
|      | Board meetings do not include regular review of performance data.                             | Yes/No |
|      | Board receives limited or no performance data.                                                | Yes/No |
|      | Board receives information on state transformation efforts.                                   | Yes/No |
|      | <b>Intermediate</b>                                                                           |        |
|      | Board receives performance data quarterly.                                                    | Yes/No |
|      | Board is apprised of CBHI performance.                                                        | Yes/No |
|      | Board includes a semi-annual review of data.                                                  | Yes/No |
|      | Board understands the importance of reform efforts.                                           | Yes/No |
|      | <b>Advanced</b>                                                                               |        |
|      | Leadership and Board are aware of all measures.                                               | Yes/No |
|      | Data presented to Board is prioritized for risk-based arrangements.                           | Yes/No |
|      | Board reviews data at the majority of meetings.                                               | Yes/No |
|      | Board can describe population implications for reform efforts.                                | Yes/No |
| Bdr2 | Leadership has a shared vision for value transformation.                                      |        |

|                                                                                     |                                                                                  |        |
|-------------------------------------------------------------------------------------|----------------------------------------------------------------------------------|--------|
|                                                                                     | <b>Preliminary</b>                                                               |        |
|                                                                                     | Population needs are assessed and identified.                                    | Yes/No |
|                                                                                     | Data is shared with leadership.                                                  | Yes/No |
|                                                                                     | Organization's vision is not data-informed.                                      | Yes/No |
|                                                                                     | Leadership staff have discussed reform opportunities.                            | Yes/No |
|                                                                                     | <b>Intermediate</b>                                                              |        |
|                                                                                     | Comprehensive strategic plan is in place.                                        | Yes/No |
|                                                                                     | Data is regularly shared across the organization.                                | Yes/No |
|                                                                                     | Performance is communicated throughout the organization.                         | Yes/No |
|                                                                                     | Organization has a performance improvement plan.                                 | Yes/No |
|                                                                                     | <b>Advanced</b>                                                                  |        |
|                                                                                     | Organization's vision is data-informed and reflects interdependency.             | Yes/No |
|                                                                                     | Organization has strong data partnerships.                                       | Yes/No |
|                                                                                     | Organization receives and utilizes population data from referral partners.       | Yes/No |
| <b>Domain 3: <i>Technological Capability to Measure Micro and Macro Results</i></b> |                                                                                  |        |
| Tech1                                                                               | Organization staff have access to regular reporting or dashboards.               |        |
|                                                                                     | <b>Preliminary</b>                                                               |        |
|                                                                                     | Data is available on diagnoses for which services are sought.                    | Yes/No |
|                                                                                     | Data is available on primary health conditions.                                  | Yes/No |
|                                                                                     | Data is analyzed for health needs of specific populations.                       | Yes/No |
|                                                                                     | <b>Intermediate</b>                                                              |        |
|                                                                                     | Regular reporting methods assess broader health needs.                           | Yes/No |
|                                                                                     | Data on broader health needs is used to drive service delivery.                  | Yes/No |
|                                                                                     | <b>Advanced</b>                                                                  | Yes/No |
|                                                                                     | Dashboards using multiple data sources are employed.                             | Yes/No |
|                                                                                     | Automated, interactive dashboards are employed.                                  | Yes/No |
|                                                                                     | Dashboards are shared with leadership.                                           | Yes/No |
| Tech2                                                                               | Organization has the capacity to manage internal and external data for analysis. | Yes/No |
|                                                                                     | <b>Preliminary</b>                                                               | Yes/No |
|                                                                                     | Data is siloed or difficult to aggregate.                                        | Yes/No |
|                                                                                     | Standard reporting is limited to query reporting.                                | Yes/No |

|       |                                                                                    |        |
|-------|------------------------------------------------------------------------------------|--------|
|       | Data integrity issues lead to inconsistent versions of the truth.                  | Yes/No |
|       | Cumbersome manual reporting makes informed actions a challenge.                    | Yes/No |
|       | <b>Intermediate</b>                                                                | Yes/No |
|       | Data is managed in a centralized location.                                         | Yes/No |
|       | IT has developed data automation for reporting.                                    | Yes/No |
|       | Diagnostic analytics are available for actionable decisions.                       | Yes/No |
|       | Reports and dashboards are used to evaluate programs.                              | Yes/No |
|       | <b>Advanced</b>                                                                    | Yes/No |
|       | Data is available through an enterprise data warehouse.                            | Yes/No |
|       | Dynamic dashboards integrating multiple sources are available.                     | Yes/No |
|       | Analysis can be accomplished through self-service data access.                     | Yes/No |
|       | <b>Domain 4: Partnerships and Collaborative Agreements</b>                         |        |
| Paco1 | Organization has agreements with strategic partners to achieve transformation.     |        |
|       | <b>Preliminary</b>                                                                 | Yes/No |
|       | Informal relationships or MOUs that have not been implemented exist.               | Yes/No |
|       | Positive working relationships exist with key partners.                            | Yes/No |
|       | Organization works regularly with community partners but has no formal agreements. | Yes/No |
|       | <b>Intermediate</b>                                                                |        |
|       | Focused partnerships are in development.                                           | Yes/No |
|       | Data is analyzed together to identify improvement opportunities.                   | Yes/No |
|       | MOUs are in development and partners meet to discuss data.                         | Yes/No |
|       | <b>Advanced</b>                                                                    | Yes/No |
|       | Formal partnerships are in place with rigorous MOUs.                               | Yes/No |
|       | Access to timely and accurate data is available to all partners.                   | Yes/No |
| Paco2 | MOU participants meet monthly to review data.                                      | Yes/No |
|       | Organization incorporates a health equity strategy.                                |        |
|       | <b>Preliminary</b>                                                                 |        |



|       |                                                                                         |        |
|-------|-----------------------------------------------------------------------------------------|--------|
|       | Organization understands referral resources for SDOH/HRSN.                              | Yes/No |
|       | Organization has referral relationships with community organizations.                   | Yes/No |
|       | Organization has communication mechanisms with referral partners.                       | Yes/No |
|       | Data can be stratified by race/ethnicity and other indicators.                          | Yes/No |
|       | <b>Intermediate</b>                                                                     |        |
|       | Organization has formal relationships or an MOU with referral partners.                 | Yes/No |
|       | Organization holds regular meetings with referral partners.                             | Yes/No |
|       | Organization has referral tracking systems with clinical responsibility.                | Yes/No |
|       | Stratified data can be shared across community partners.                                | Yes/No |
|       | <b>Advanced</b>                                                                         |        |
|       | Data on disparities is acted upon by the organization.                                  | Yes/No |
|       | Organization has dedicated care teams for SDOH/HRSN.                                    | Yes/No |
|       | Organization can provide seamless coordination of social service needs.                 | Yes/No |
| Paco3 | Organization demonstrates proficiency in managing performance-based contracts.          |        |
|       | <b>Preliminary</b>                                                                      |        |
|       | Organization operates solely on fee for service billing.                                | Yes/No |
|       | Organization has experience negotiating fee for service contracts.                      | Yes/No |
|       | Contracts with managed care organizations do not include performance expectations.      | Yes/No |
|       | <b>Intermediate</b>                                                                     |        |
|       | Organization has experience negotiating pay-for-performance contracts with upside risk. | Yes/No |
|       | Contracts with managed care organizations include an incentive based VBP arrangement.   | Yes/No |
|       | <b>Advanced</b>                                                                         |        |
|       | Organization has experience with negotiating downside risk-bearing contracts.           | Yes/No |
|       | Risk adjustment strategies are in place for higher need populations.                    | Yes/No |
|       | Managed care contracts have sharing VBP agreements.                                     | Yes/No |

|      |                                                                                                                       |        |
|------|-----------------------------------------------------------------------------------------------------------------------|--------|
|      | <b>Domain 6: Financial Management Capabilities &amp; Cash-Flow Reserves</b>                                           |        |
| Fin1 | Organization's EMR/EHR is configured for integrated data access and analysis.                                         |        |
|      | <b>Preliminary</b>                                                                                                    |        |
|      | Practices are primarily paper-based or lack full functionality of EHR/EMR.                                            | Yes/No |
|      | Data integrity challenges persist for practice management.                                                            | Yes/No |
|      | <b>Intermediate</b>                                                                                                   |        |
|      | EHR/EMR is configured for information management.                                                                     | Yes/No |
|      | Accessible reports are available for practice management.                                                             | Yes/No |
|      | <b>Advanced</b>                                                                                                       |        |
|      | EHR/EMR provides tracking of outcomes and data sharing capabilities.                                                  | Yes/No |
|      | Additional functionality includes dashboarding of population health management.                                       | Yes/No |
|      | EHR/EMR is used for VBP payment reporting.                                                                            | Yes/No |
| Fin2 | Organization conducts analysis of its current financial performance.                                                  |        |
|      | <b>Preliminary</b>                                                                                                    |        |
|      | Organization has general volume-based targets.                                                                        | Yes/No |
|      | Regular reports on financial indicators are conducted.                                                                | Yes/No |
|      | <b>Intermediate</b>                                                                                                   |        |
|      | Key Performance Indicators (KPI) are monitored regularly.                                                             | Yes/No |
|      | KPIs are defined for meaningful metrics in VBP.                                                                       | Yes/No |
|      | Total Cost of care is monitored alongside patient gaps.                                                               | Yes/No |
|      | <b>Advanced</b>                                                                                                       |        |
|      | Financial KPIs are tracked and compared to benchmarks.                                                                | Yes/No |
|      | Reports on financial health inform negotiations for value-based contracts.                                            | Yes/No |
|      | Organization can assess financial impact of services provided.                                                        | Yes/No |
| Fin4 | Organization has conducted a comprehensive analysis of its financial capacity to participate in risk-based contracts. |        |
|      | <b>Preliminary</b>                                                                                                    |        |

|  |                                                                                         |        |
|--|-----------------------------------------------------------------------------------------|--------|
|  | Organization has not analyzed its cost of delivering services.                          | Yes/No |
|  | Organization understands its cost but has not analyzed its ability to bear risk.        | Yes/No |
|  | <b>Intermediate</b>                                                                     |        |
|  | Organization has conducted an analysis of its ability to bear risk.                     | Yes/No |
|  | A financial model is available to anticipate impact on patient population.              | Yes/No |
|  | <b>Advanced</b>                                                                         |        |
|  | Organization has meaningful financial models and determined capacity for risk-sharing.  | Yes/No |
|  | A reserve has been established to support payment reform planning.                      | Yes/No |
|  | Organization has utilized financial models for negotiations for risk-sharing contracts. | Yes/No |
|  | Analysis of impact of proposed APMs on revenues has been completed.                     | Yes/No |

## 2. Purchaser Preparedness Assessment Tool

(Participants from: EHIS clusters, CBHI units, RHB finance teams, and federal EHIA/CBHI)

| Section I: organizational Characteristics |                                                                     |                                                                                                                                                                                      |            |
|-------------------------------------------|---------------------------------------------------------------------|--------------------------------------------------------------------------------------------------------------------------------------------------------------------------------------|------------|
| Code                                      | Question                                                            | Response                                                                                                                                                                             | Skip Logic |
| <b>Facility Identification</b>            |                                                                     |                                                                                                                                                                                      |            |
| PRS-01                                    | Region                                                              | 1. Oromia<br>2. SW region<br>3. Somali<br>4. AA                                                                                                                                      | -          |
| PRS-02                                    | Facility name                                                       | Text: _____                                                                                                                                                                          | -          |
| PRS-03                                    | Facility type                                                       | 1. <b><i>EHIS clusters</i></b><br>2. <b><i>CBHI units</i></b><br>3. <b><i>RHB finance teams</i></b><br>4. <b><i>federal EHIA/CBHI</i></b><br>5. Other(specify)                       |            |
| PRS-04                                    | Your role in this institution                                       | 1. <b><i>Head</i></b><br>2. <b><i>HIS technician</i></b><br>3. <b><i>Finance expert</i></b><br>4. <b><i>Health expert/consultant</i></b><br>5. Health economist<br>6. Other(specify) |            |
|                                           | Your profession                                                     | 9. Physician (all type)<br>10. Nurse (all type)<br>11. Health officer<br>12. Environmental health<br>13. HIT<br>14. Midwifery<br>15. Nutrition<br>16. Other(specify)                 |            |
|                                           | Educational status                                                  | 6. Diploma<br>7. BSc<br>8. MSc/MPH<br>9. Specialty certificate<br>10. Sub-specialty                                                                                                  |            |
|                                           | Total years of experience                                           | (in years)                                                                                                                                                                           |            |
|                                           | years of experience in this institution                             | (in years)                                                                                                                                                                           |            |
| <b>OPERATIONAL CAPACITY</b>               |                                                                     |                                                                                                                                                                                      |            |
| OC-01                                     | Number of full-time staff dedicated to provider payment management: | Numeric: _____                                                                                                                                                                       | —          |
| OC-02                                     | Percentage of staff trained in health                               | Numeric: _____%                                                                                                                                                                      | —          |

|                                |                                                                                        |                                                                                                                                                                                                         |                                                |
|--------------------------------|----------------------------------------------------------------------------------------|---------------------------------------------------------------------------------------------------------------------------------------------------------------------------------------------------------|------------------------------------------------|
|                                | financing/payment mechanisms:                                                          |                                                                                                                                                                                                         |                                                |
| OC-03                          | Does the purchaser have documented SOPs for claims processing?                         | <input type="checkbox"/> Yes <input type="checkbox"/> No                                                                                                                                                | If <b>No</b> , skip to OC-05                   |
| OC-04                          | Frequency of SOP updates:                                                              | <input type="checkbox"/> Quarterly <input type="checkbox"/> Biannually <input type="checkbox"/> Annually<br><input type="checkbox"/> Never                                                              | —                                              |
| OC-05                          | How often are staff skills refreshed (training/re-training)?                           | <input type="checkbox"/> Quarterly <input type="checkbox"/> Biannually <input type="checkbox"/> Annually<br><input type="checkbox"/> Never                                                              | —                                              |
| <b>DATA ANALYSIS SYSTEMS</b>   |                                                                                        |                                                                                                                                                                                                         |                                                |
| DA-01                          | Which systems are used for claims processing? (Select all)                             | <input type="checkbox"/> Dedicated software <input type="checkbox"/> Spreadsheets<br><input type="checkbox"/> Manual ledgers <input type="checkbox"/> Other: _____                                      | —                                              |
| DA-02                          | Can the system generate real-time reports on: (Select all)                             | <input type="checkbox"/> Claims volume <input type="checkbox"/> Rejection rates <input type="checkbox"/> Provider performance <input type="checkbox"/> Expenditure trends <input type="checkbox"/> None | —                                              |
| DA-03                          | Is the system integrated with national health databases (e.g., HMIS, CBHI enrollment)? | <input type="checkbox"/> Yes <input type="checkbox"/> No                                                                                                                                                | If <b>No</b> , skip to DA-05                   |
| DA-04                          | Frequency of data synchronization with external systems:                               | <input type="checkbox"/> Real-time <input type="checkbox"/> Daily <input type="checkbox"/> Weekly <input type="checkbox"/> Monthly                                                                      | —                                              |
| DA-05                          | Automated fraud detection capabilities:                                                | <input type="checkbox"/> Yes <input type="checkbox"/> Partial <input type="checkbox"/> No                                                                                                               | —                                              |
| <b>CONTRACT ADMINISTRATION</b> |                                                                                        |                                                                                                                                                                                                         |                                                |
| CA-01                          | Number of active provider contracts managed:                                           | Numeric: _____                                                                                                                                                                                          | —                                              |
| CA-02                          | Are contracts standardized with clear payment terms?                                   | <input type="checkbox"/> Yes <input type="checkbox"/> No <input type="checkbox"/> Partial                                                                                                               | If <b>No</b> or <b>Partial</b> , skip to CA-04 |
| CA-03                          | Key payment terms included: (Select all)                                               | <input type="checkbox"/> Service packages <input type="checkbox"/> Payment rates<br><input type="checkbox"/> Performance targets <input type="checkbox"/> Penalties <input type="checkbox"/> Timelines  | —                                              |
| CA-04                          | Average time to resolve contract disputes (days):                                      | Numeric: _____                                                                                                                                                                                          | —                                              |

|                                 |                                                                            |                                                                                                                                                                                                                |                               |
|---------------------------------|----------------------------------------------------------------------------|----------------------------------------------------------------------------------------------------------------------------------------------------------------------------------------------------------------|-------------------------------|
| CA-05                           | Are providers categorized by service complexity (e.g., primary/specialty)? | <input type="checkbox"/> Yes <input type="checkbox"/> No                                                                                                                                                       | —                             |
| <b>REIMBURSEMENT MECHANISMS</b> |                                                                            |                                                                                                                                                                                                                |                               |
| RM-01                           | Primary reimbursement methods used: (Select all)                           | <input type="checkbox"/> Capitation <input type="checkbox"/> Case-Based <input type="checkbox"/> Fee-for-Service <input type="checkbox"/> Global Budget <input type="checkbox"/> Line-Item Budget              | —                             |
| RM-02                           | Average claim processing time (days):                                      | Numeric: _____                                                                                                                                                                                                 | —                             |
| RM-03                           | Claim rejection rate in the last quarter:                                  | Numeric: _____%                                                                                                                                                                                                | —                             |
| RM-04                           | Top reasons for claim rejection: (Select all)                              | <input type="checkbox"/> Incomplete documentation <input type="checkbox"/> Coding errors <input type="checkbox"/> Ineligible services <input type="checkbox"/> Duplicate claims <input type="checkbox"/> Fraud | —                             |
| RM-05                           | Are reimbursement rates adjusted for: (Select all)                         | <input type="checkbox"/> Geography <input type="checkbox"/> Facility level <input type="checkbox"/> Case severity <input type="checkbox"/> Inflation                                                           | —                             |
| <b>CBP MANAGEMENT SPECIFICS</b> |                                                                            |                                                                                                                                                                                                                |                               |
| CBP-01                          | Does the purchaser use DRG/ICD coding for case-based payments?             | <input type="checkbox"/> Yes <input type="checkbox"/> No                                                                                                                                                       | If <b>No</b> , skip to CBP-04 |
| CBP-02                          | Number of DRG/ICD code categories used:                                    | Numeric: _____                                                                                                                                                                                                 | —                             |
| CBP-03                          | Frequency of DRG/ICD codebook updates:                                     | <input type="checkbox"/> Quarterly <input type="checkbox"/> Biannually <input type="checkbox"/> Annually <input type="checkbox"/> Never                                                                        | —                             |
| CBP-04                          | Are case-based payments cross-checked against clinical records?            | <input type="checkbox"/> Yes <input type="checkbox"/> No <input type="checkbox"/> Sample audits                                                                                                                | —                             |
| CBP-05                          | Are outlier cases (high-cost/low-frequency) handled differently?           | <input type="checkbox"/> Yes <input type="checkbox"/> No                                                                                                                                                       |                               |
| <b>Purchaser Identification</b> |                                                                            |                                                                                                                                                                                                                |                               |
| PPA-01                          | Purchaser organization name                                                | Text: _____                                                                                                                                                                                                    | -                             |
| PPA-02                          | Purchaser type                                                             | 1. Ministry of Health<br>2. Ethiopian Health Insurance Service<br>3. Private Insurer<br>4. Donor/Partner                                                                                                       | -                             |

| Operational Capacity     |                                                                 |                                                                                                           |   |
|--------------------------|-----------------------------------------------------------------|-----------------------------------------------------------------------------------------------------------|---|
| PPA-03                   | Number of full-time staff dedicated to provider payment systems | Numeric: _____                                                                                            | - |
| PPA-04                   | Staff expertise level in health financing (1–5 scale)           | 1. Very low<br>2. Low<br>3. Moderate<br>4. High<br>5. Very high                                           | - |
| PPA-05                   | IT infrastructure supports real-time claims processing?         | 1. Yes<br>2. No                                                                                           | - |
| Data Analysis Systems    |                                                                 |                                                                                                           |   |
| PPA-06                   | Systems used for claims data analysis (Select all)              | 1. DHIS2<br>2. Custom software<br>3. Excel/Manual<br>4. Other: _____                                      | - |
| PPA-07                   | Frequency of cost-efficiency reports for providers              | 1. Monthly<br>2. Quarterly<br>3. Annually<br>4. Never                                                     | - |
| PPA-08                   | Data used to set payment rates (Select all)                     | 1. Historical claims<br>2. Costing studies<br>3. National benchmarks<br>4. Other: _____                   | - |
| Contract Administration  |                                                                 |                                                                                                           |   |
| PPA-09                   | Are provider contracts standardized?                            | 1. Yes<br>2. No                                                                                           | - |
| PPA-10                   | Key performance indicators (KPIs) in contracts (Select top 3)   | 1. Service volumes<br>2. Quality metrics<br>3. Cost targets<br>4. Patient satisfaction<br>5. Other: _____ | - |
| PPA-11                   | Frequency of contract compliance audits                         | 1. Quarterly<br>2. Biannually<br>3. Annually<br>4. Never                                                  | - |
| Reimbursement Mechanisms |                                                                 |                                                                                                           |   |
| PPA-12                   | Timeliness of reimbursements to providers                       | 1. ≤30 days<br>2. 31–60 days<br>3. >60 days<br>4. Unpredictable                                           | - |
| PPA-13                   | Methods to verify claims validity (Select all)                  | 1. Pre-payment audits<br>2. Post-payment audits                                                           | - |

|                                 |                                                        |                                                                                      |   |
|---------------------------------|--------------------------------------------------------|--------------------------------------------------------------------------------------|---|
|                                 |                                                        | 3. Automated algorithms<br>4. Spot checks                                            |   |
| <b>CBP Management Specifics</b> |                                                        |                                                                                      |   |
| PPA-14                          | Capitation rate calculation methodology                | 1. Age/risk-adjusted<br>2. Flat rate<br>3. Historical utilization<br>4. Other: _____ | - |
| PPA-15                          | Mechanisms to monitor provider gaming under CBP        | 1. Data analytics<br>2. Patient feedback<br>3. Clinical audits<br>4. None            | - |
| PPA-16                          | Adjustments for high-cost cases in case-based payments | 1. Yes, outlier payments<br>2. Yes, severity adjustments<br>3. No                    | - |
